# Supplementary material
Source: bioRxiv or medRxiv preprint supplement (https://www.biorxiv.org/highwire/filestream/43175/field_highwire_adjunct_files/0/087247-1.pdf)

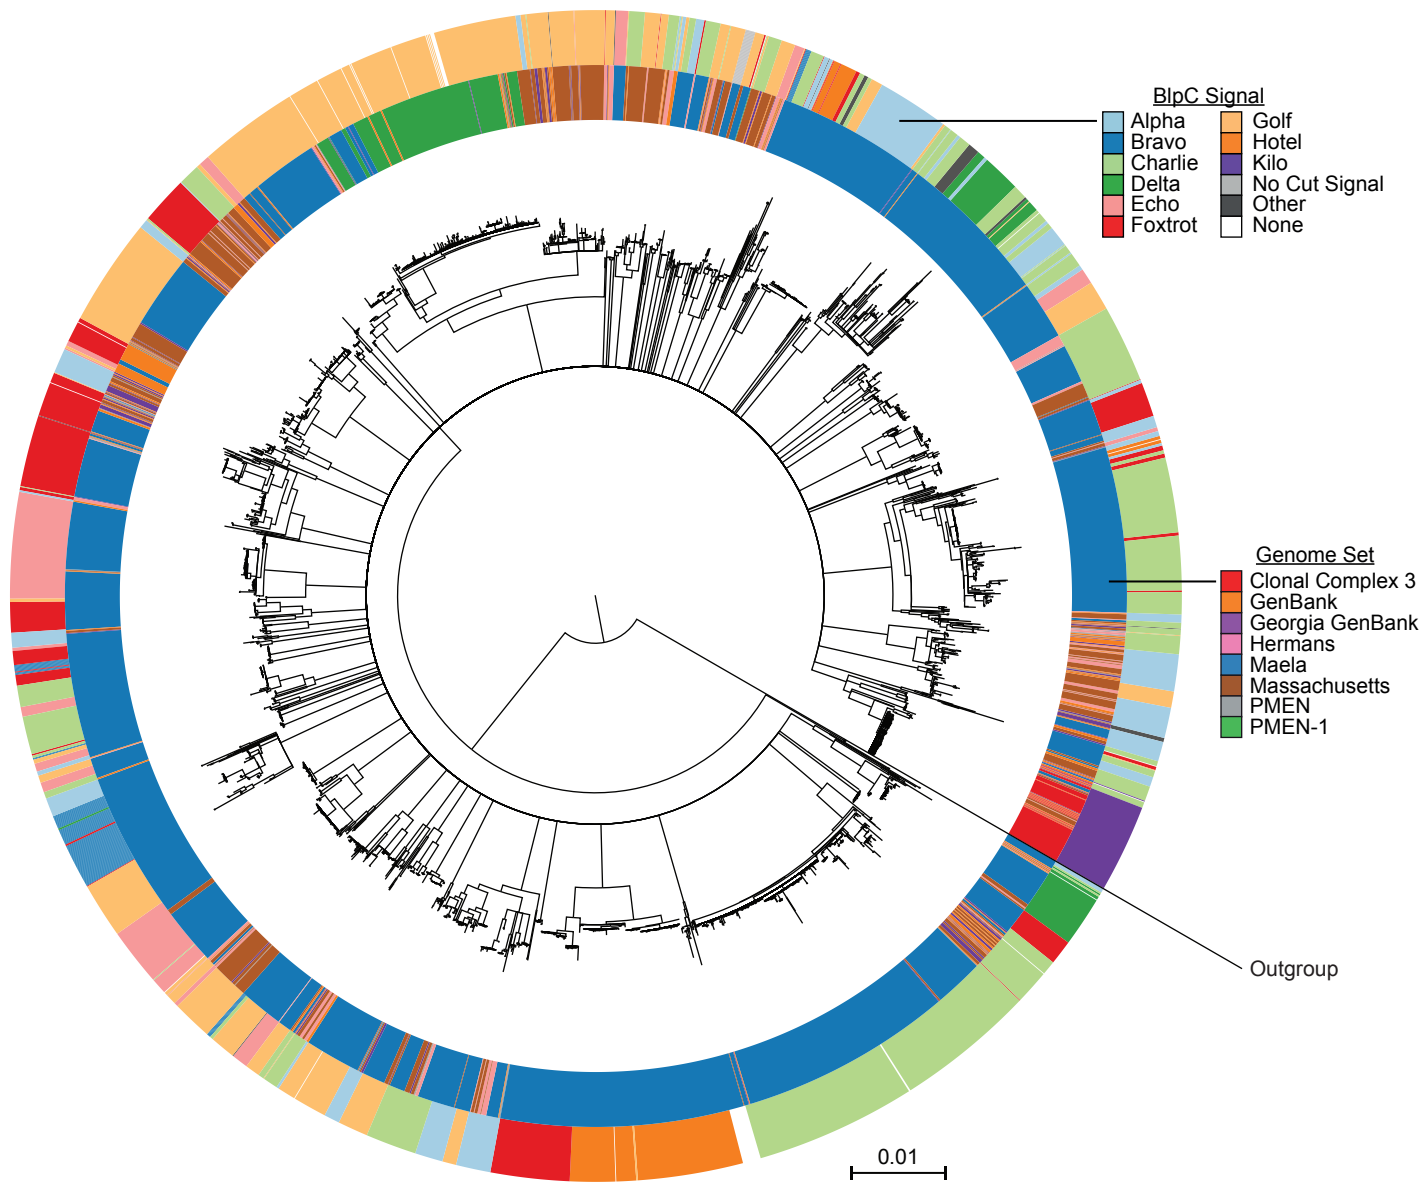

Supplement: Supplementary file [file 087247-1.pdf]
